# Supplementary material for: Characterization of the Clinical Significance and Immunological Landscapes of a Novel TMEMs Signature in Hepatocellular Carcinoma and the Contribution of TMEM201 to Hepatocarcinogenesis
Source: MDPI journal article supplement (doi:10.3390/ijms241210285), 2023-06-17
Supplement: s1 [file s1]

**Table S2.**

**The primers sequences information of the genes and siRNA used in our study**

| <b>Symbol</b>     | <b>Sequences</b>                                                               |
|-------------------|--------------------------------------------------------------------------------|
| <b>TMEM201</b>    | F AGGATACGCTGGTGGCCCTATG<br>R TCTCCTGGAAGCCGTTGTACTG                           |
| <b>MICA</b>       | F- CTCGGATTTCAGCCTCTGATG<br>R- CAGGAAACTGAGGCACCAAGAG                          |
| <b>GADPH</b>      | F AAGGTGAAGGTCGGAGTCAAC<br>R GGGGTCATTGATGGCAACAATA                            |
| <b>si-TMEM201</b> | Sense 5'-3' ACCAGACCACCAAGAUCAATT<br>Antisense 5'-3' UUGAUCUUGGUGGUCUGGUTT     |
| <b>si-NC</b>      | Sense 5-3' UUCUCCGAACGUGUCACGUTT-3'<br>Antisense 5-3' ACGUGACACGUUCGGAGAATT-3' |

**The primary and secondary antibodies for Western blotting**

|                                            |                           |
|--------------------------------------------|---------------------------|
| <b>Anti-TMEM201</b>                        | Proteintech , #24092-1-AP |
| <b>Anti-GADPH</b>                          | CST, #97166               |
| <b>Anti-rabbit IgG-HRP-linked Antibody</b> | CST, #7074                |
| <b>Anti-mouse IgG-HRP-linked Antibody</b>  | CST, #7076                |
