# Supplementary material for: Characterization of the Clinical Significance and Immunological Landscapes of a Novel TMEMs Signature in Hepatocellular Carcinoma and the Contribution of TMEM201 to Hepatocarcinogenesis
Source: MDPI journal article supplement (doi:10.3390/ijms241210285), 2023-06-17
Supplement: s1 [file s1]

**Table S1. Univariate Cox regression of candidate TMEMs**

| <b>TMEM protein family genes</b> | <b>HR (95% CI)</b>      | <b>P value</b> |
|----------------------------------|-------------------------|----------------|
| TMEM120B                         | 2.066 (1.451-2.941)     | <0.001         |
| TMEM79                           | 1.838 (1.352-2.500)     | <0.001         |
| TMEM145                          | 1.069 (0.876-1.304)     | 0.510          |
| TMEM26                           | 1.711 (0.985-2.971)     | 0.056          |
| TMEM201                          | 1.760 (1.395-2.221)     | <0.001         |
| TMEM106C                         | 1.599 (1.330-1.924)     | <0.001         |
| TMEM132A                         | 1.171 (1.044-1.312)     | 0.007          |
| TMEM262                          | 2.891 (1.621-5.157)     | <0.001         |
| TMEM81                           | 1.739 (1.305-2.319)     | <0.001         |
| TMEM150B                         | 1.103 (0.982-1.239)     | 0.099          |
| TMEM164                          | 1.566 (1.289-1.903)     | <0.001         |
| TMEM220                          | 0.797 (0.687-0.925)     | 0.003          |
| TMEM266                          | 1.186 (0.916-1.535)     | 0.195          |
| TMEM198                          | 1.035 (0.870-1.232)     | 0.696          |
| TMEM178B                         | 1.124 (0.876-1.442)     | 0.357          |
| TMEM253                          | 0.972 (0.508-1.858)     | 0.932          |
| TMEM71                           | 0.774 (0.476-1.261)     | 0.304          |
| TMEM151B                         | 83.395 (6.315-1101.307) | <0.001         |
| TMEM74                           | 1.347 (1.086-1.671)     | 0.007          |
| TMEM61                           | 1.146 (0.968-1.358)     | 0.114          |
| TMEM154                          | 0.922 (0.692-1.228)     | 0.577          |
| TMEM249                          | 2.037 (1.057-3.926)     | 0.034          |
| TMEM74B                          | 1.163 (0.999-1.354)     | 0.052          |
| TMEM191C                         | 2.967 (1.241-7.094)     | 0.014          |
| TMEM108                          | 2.552 (1.384-4.706)     | 0.003          |
| TMEM98                           | 1.190 (1.048-1.351)     | 0.007          |
| TMEM82                           | 0.929 (0.846-1.020)     | 0.122          |
| TMEM151A                         | 1.091 (0.952-1.249)     | 0.209          |
| TMEM132B                         | 1.277 (0.833-1.957)     | 0.262          |
| TMEM119                          | 1.050 (0.926-1.191)     | 0.446          |
| TMEM163                          | 1.072 (0.922-1.246)     | 0.364          |
| TMEM47                           | 0.986 (0.850-1.144)     | 0.853          |
| TMEM40                           | 1.246 (0.924-1.681)     | 0.150          |
| TMEM132E                         | 0.783 (0.502-1.220)     | 0.279          |
| TMEM155                          | 1.346 (0.958-1.891)     | 0.087          |
| TMEM52B                          | 0.967 (0.710-1.317)     | 0.831          |
| TMEM270                          | 1.066 (0.858-1.326)     | 0.564          |
| TMEM72                           | 1.193 (0.997-1.429)     | 0.054          |
| TMEM25                           | 0.999 (0.848-1.176)     | 0.987          |

|          |                     |        |
|----------|---------------------|--------|
| TMEM269  | 1.800 (0.620-5.227) | 0.280  |
| TMEM54   | 1.188 (1.065-1.325) | 0.002  |
| TMEM191B | 0.978 (0.576-1.660) | 0.934  |
| TMEM89   | 1.367 (0.640-2.921) | 0.420  |
| TMEM45A  | 1.184 (1.072-1.307) | <0.001 |
| TMEM63C  | 1.243 (0.956-1.615) | 0.104  |
| TMEM59L  | 1.234 (0.860-1.771) | 0.253  |
| TMEM45B  | 1.050 (0.956-1.153) | 0.307  |
| TMEM200A | 1.176 (0.906-1.525) | 0.223  |
| TMEM35A  | 1.209 (0.819-1.786) | 0.340  |
| TMEM238L | 1.001 (0.666-1.502) | 0.998  |
| TMEM156  | 1.112 (0.997-1.241) | 0.057  |
